# Supplementary material
Source: PubMed Central journal article supplement (PMC4437546)
Supplement: NIHMS682193-supplement-01.pdf [file NIHMS682193-supplement-01.pdf]

## Supplemental Figure 1

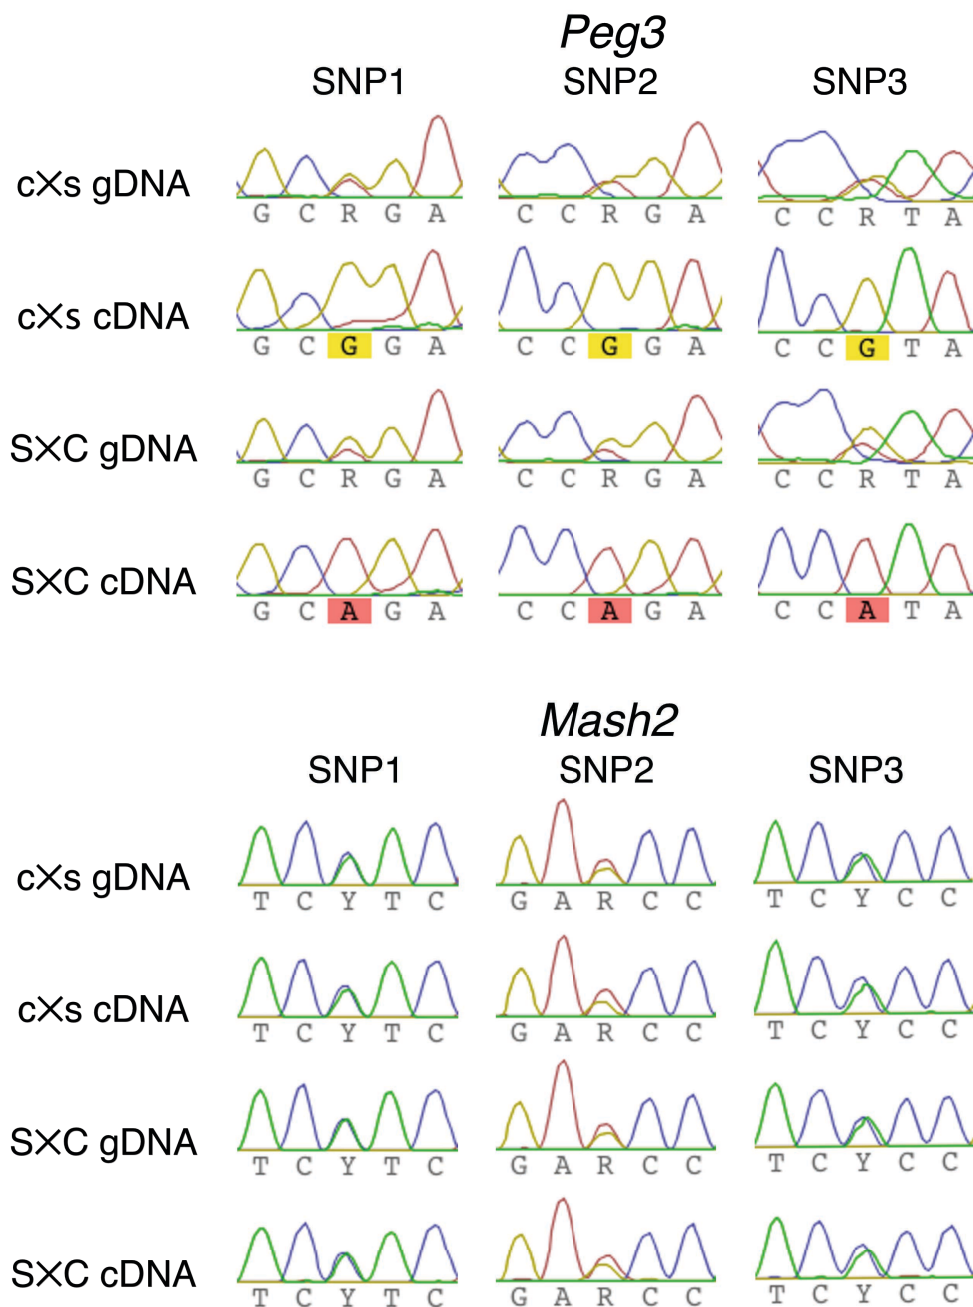

Supplemental Figure 1: Examples of a gene that is properly imprinted in reciprocal hybrids (*Peg3*, top) and one that shows biallelic expression in hybrids (*Mash2*, bottom). Genomic DNA (gDNA) and complement DNA (cDNA) from the same individual demonstrate heterozygosity at three fixed differences in the gDNA sequences for both of these genes. In contrast, when cDNA is sequenced, these heterozygous positions show imprinted expression of *Peg3* and biallelic expression of *Mash2*.

Supplemental Figure 2

A

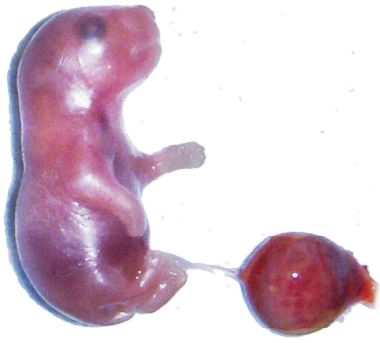

B

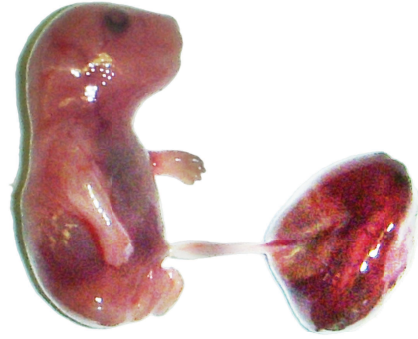

C

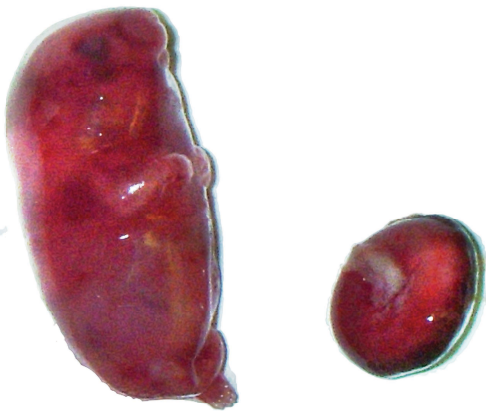

D

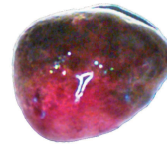

1 cm

Supplemental Figure 2: (A) Normal *P. campbelli* offspring with average sized placenta. (B) Overgrown SXC offspring with an enlarged placenta. (C) Overgrown SXC offspring with severe edema (swelling) of the body and an enlarged placenta. (D) Overgrown SXC molar conceptus. All images are to scale.

Table S1: Mammalian crosses that show abnormal growth effects

| Order          | Family           | Parent 1                                            | Parent 2                                 | 1x2   | 2x1                | Reference                                    | Silent Nucleotide Divergence (Dxy) at cyt b (K2P corrected) | GenBank sequences used to estimate Dxy        | Quote                                                                                                                                                                                                                                                                                                                                                                                                                                         |
|----------------|------------------|-----------------------------------------------------|------------------------------------------|-------|--------------------|----------------------------------------------|-------------------------------------------------------------|-----------------------------------------------|-----------------------------------------------------------------------------------------------------------------------------------------------------------------------------------------------------------------------------------------------------------------------------------------------------------------------------------------------------------------------------------------------------------------------------------------------|
| Artiodactyla   | Bovidae          | <i>Ammotragus levia</i>                             | <i>Capra hircus</i>                      | NA    | Small              | Gray (1972) #382                             | 0.1254                                                      | AF034731.1, AB044308.1                        | "Full-term hybrid kids... [were] smaller than average full-term goat kids."                                                                                                                                                                                                                                                                                                                                                                   |
| Artiodactyla   | Bovidae          | <i>Bison bison</i>                                  | <i>Bison bonasus</i>                     | NA    | Large              | Gray (1972) #383                             | 0.0773                                                      | AF036273.1, Y1005.1                           | "males in particular show heterosis in respect of body size. ... a male hybrid born at Schoenbrunn was as heavy, at 2 years of age, as an adult 5-year-old European Bison."                                                                                                                                                                                                                                                                   |
| Artiodactyla   | Bovidae          | <i>Bison bison</i>                                  | <i>Bos taurus</i>                        | Large | Large              | Gray (1972) #383                             | 0.0712                                                      | AF036273.1, GU249573.1                        | "The F1 hybrids are long-lived, uniform in type, more docile than bison, and show heterosis. Very heavy losses of both calves and dams have resulted from matings between bison bulls and domestic cows, as the latter invariably secrete excessive amounts of amniotic fluid. The percentages of abortions and stillbirths are particularly high among mlac calves. ... In the domestic bull x bison cow cross mortality is relatively low." |
| Artiodactyla   | Bovidae          | <i>Bison bonasus</i>                                | <i>Bos taurus</i>                        | Large | Large              | Gray (1972) #384                             | 0.0712                                                      | GU249573.1, Y1005.1                           | "The F1 hybrids were hardy and showed heterosis in respect to birth weight, growth rate (especially in the first 6 months of life), disease resistance, strength, and cold tolerance. When the wisent was the dam, the birth weight of the calves was less than when the domestic cow was the dam."                                                                                                                                           |
| Artiodactyla   | Bovidae          | <i>Bos grunniens</i>                                | <i>Bos indicus</i>                       | Large | Large              | Gray (1972) #389                             | 0.0742                                                      | EU807952.1, EF061244.1                        | "The hybrids often show heterosis in respect to body size"                                                                                                                                                                                                                                                                                                                                                                                    |
| Artiodactyla   | Bovidae          | <i>Bos grunniens</i>                                | <i>Bos taurus</i>                        | Large | Large              | Gray (1972) #389                             | 0.0757                                                      | EU807952.1, GU249573.1                        | "Opinions differ as to what extent hybrids show heterosis. In general, it seems that they are intermediate in body size when bulls of improved domestic breeds are used, but surpass both parents when sired by bulls of unimproved stock."                                                                                                                                                                                                   |
| Artiodactyla   | Bovidae          | <i>Capra hircus</i>                                 | <i>Capra caucasica</i>                   | Large | NA                 | Gray (1972) #394                             | 0.0385                                                      | AB044308.1, DQ246801.1                        | "The F1 hybrids reported by Misarev were heavier than either parental species at 4/5 years"                                                                                                                                                                                                                                                                                                                                                   |
| Artiodactyla   | Bovidae          | <i>Ovis arvens</i>                                  | <i>Ovis ammon karelini</i>               | Large | NA                 | Gray (1972) #446                             | 0.0312                                                      | JX567831.1, AJ867276.1                        | "In general appearance, conformation, and temperament the F1 hybrids tend to resemble the wild species, but they surpass the arkhar in body weight and wool characteristics."                                                                                                                                                                                                                                                                 |
| Artiodactyla   | Camelidae        | <i>Camelus bactrianus</i>                           | <i>Camelus dromedarius</i>               | Large | Intermediate       | Gray (1972) #532                             | 0.1062                                                      | AY126625.1, AY126630.1                        | "The F1 hybrids show heterosis with regard to body measurements, hardness, endurance, longevity, and certain blood characteristics. The F1 hybrids are large, strong animals equally well adapted for draft and pack work. The cross between the male dromedary and the female bactrian camel is larger than the reciprocal cross at 3 months of age."                                                                                        |
| Artiodactyla   | Cervidae         | <i>Cervus elaphus elaphus</i>                       | <i>Cervus elaphus asiaticus</i>          | Large | NA                 | Gray (1972) #498                             | NA                                                          | No data for <i>Cervus elaphus asiaticus</i>   | "The hybrids are large animals."                                                                                                                                                                                                                                                                                                                                                                                                              |
| Artiodactyla   | Cervidae         | <i>Rangifer tarandus tarandus</i>                   | <i>Rangifer tarandus caribou</i>         | Large | NA                 | Gray (1972) #530                             | 0.0056                                                      | AY72681.1, DQ673135.1                         | "[The F1 hybrid] is larger than the reindeer at birth (13-16lbs compared with 10-13) and weighs 50-100lbs more when full grown."                                                                                                                                                                                                                                                                                                              |
| Carnivora      | Canidae          | <i>Vulpes fulva</i>                                 | <i>Alopex lagopus</i>                    | Large | NA                 | Gray (1972) #163                             | 0.1387                                                      | JQ003578.1, AY598511.1                        | "The hybrid surpassed both parental species in growth rate and body length. They are stronger and more vicious than either parent"                                                                                                                                                                                                                                                                                                            |
| Carnivora      | Felidae          | <i>Felis catus</i>                                  | <i>Felis silvestris</i>                  | Large | NA                 | Gray (1972) #129                             | 0.0042                                                      | AB194817.1, EF689045.1                        | "The young hybrids reported by Peters were rather heavier than domestic cats of the same age"                                                                                                                                                                                                                                                                                                                                                 |
| Carnivora      | Felidae          | <i>Felis concolor (Puma concolor)</i>               | <i>Panthera pardus</i>                   | Small | Small              | Gray (1972) #131                             | 0.1929                                                      | GU175442.1, EF056506.1                        | "Body length was much less than in either parental species"                                                                                                                                                                                                                                                                                                                                                                                   |
| Carnivora      | Felidae          | <i>Panthera pardus fusca</i>                        | <i>Felis concolor (Puma concolor)</i>    | NA    | Small              | Gray (1972) #131                             | 0.1929                                                      | GU175442.1, EF056506.1                        | "The hybrid described by Hemmer was a fairly small animal."                                                                                                                                                                                                                                                                                                                                                                                   |
| Carnivora      | Felidae          | <i>Panthera leo</i>                                 | <i>Panthera tigris</i>                   | Large | Small              | Gray (1972) #141                             | 0.1158                                                      | JX023542.1, KC879296.1                        | "The hybrids [Tiger female x Lion male] are often larger than either parental species. According to Reisinger, one male hybrid weighed as much as both parents together. A female backcross (male P. leo x F1) was described as much smaller than a normal lioness"                                                                                                                                                                           |
| Carnivora      | Felidae          | <i>Panthera onca</i>                                | <i>Panthera pardus</i>                   | Large | Intermediate       | Gray (1972) #142                             | 0.1376                                                      | EF056506.1, GU175435.1                        | "When barely 9 months of age, the hybrids [female P. pardus x male P. onca] surpassed their dam in body size. At 1.5 years they were intermediate between sire and dam at height at the withers. [In the reciprocal cross] At 6 months of age, the hybrids were considerably stronger than lionards or jaguars of the same age."                                                                                                              |
| Carnivora      | Mustelidae       | <i>Mustela putorius furo</i>                        | <i>Mustela putorius putorius</i>         | Large | NA                 | Gray (1972) #188                             | 0.0000                                                      | AB026103.1, AF057128.1                        | "The hybrids have a rapid growth rate and appear to be fully fertile."                                                                                                                                                                                                                                                                                                                                                                        |
| Carnivora      | Ursidae          | <i>Thalactos maritimus (Ursus maritimus)</i>        | <i>Ursus arctos middendorffi</i>         | Large | Large              | Gray (1972) #194                             | 0.0126**                                                    | AP012597.1, UO497665.1                        | "The F1 hybrids are large animals of normal viability."                                                                                                                                                                                                                                                                                                                                                                                       |
| Perissodactyla | Equidae          | <i>Equus asinus</i>                                 | <i>Equus grevyi</i>                      | Large | Large              | Gray (1972) #352                             | 0.0562                                                      | JF718884.1, JF718890.1                        | "The [E. grevyi x E. asinus] hybrids are superior to either parent in action, conformation and disposition. The [E. asinus x E. grevyi] hybrids reported by Rzasnicki grew rapidly, and at 2 years of age were larger than their dam."                                                                                                                                                                                                        |
| Perissodactyla | Equidae          | <i>Equus asinus</i>                                 | <i>Equus hemionus onager</i>             | Large | NA                 | Gray (1972) #352                             | 0.0517                                                      | JF718884.1, JF718887.1                        | "the hybrids are said to be larger and of better appearance than males or asses."                                                                                                                                                                                                                                                                                                                                                             |
| Perissodactyla | Equidae          | <i>Equus caballus</i>                               | <i>Equus caballus</i>                    | Large | Small              | Allen (1969), Allen (1993), Gray (1972) #352 | 0.0773                                                      | JF718884.1, KC968811.1                        | "The hybrids are said to be larger and of better appearance than males or asses."                                                                                                                                                                                                                                                                                                                                                             |
| Perissodactyla | Equidae          | <i>Equus burchelli antiquorum</i>                   | <i>Equus przewalski</i>                  | Large | Small              | Gray (1972) #359                             | 0.0924                                                      | JF718884.1, JF718883.1                        | Donkeys carrying hybrids show enlarged endometrial cups compared to horses carrying hybrids.                                                                                                                                                                                                                                                                                                                                                  |
| Perissodactyla | Equidae          | <i>Equus caballus</i>                               | <i>Equus hemionus khur</i>               | NA    | Small              | Gray (1972) #362                             | 0.0847                                                      | JF718887.1, KC968811.1                        | "The male [hybrid] described by Gurali showed heterosis in body measurements"                                                                                                                                                                                                                                                                                                                                                                 |
| Perissodactyla | Equidae          | <i>Equus zebra</i>                                  | <i>Equus caballus</i>                    | Large | NA                 | Gray (1972) #362                             | 0.0848                                                      | KC968811.1, JF718889.1                        | "the hybrid was smaller than it's dam"                                                                                                                                                                                                                                                                                                                                                                                                        |
| Primate        | Cercopithecoidea | <i>Macaca radiata</i>                               | <i>Macaca sinica</i>                     | NA    | Small              | Gray (1972) #63                              | NA                                                          | No data for <i>Macaca sinica</i>              | "at one year of age [the hybrid] was taller than either parent"                                                                                                                                                                                                                                                                                                                                                                               |
| Primate        | Cercopithecoidea | <i>Macaca silenus</i>                               | <i>Macaca nemestrina</i>                 | NA    | Small              | Gray (1972) #61                              | 0.1309                                                      | AF530404.1, EU204975.1                        | "One hybrid was rather small at birth"                                                                                                                                                                                                                                                                                                                                                                                                        |
| Primate        | Lemuridae        | <i>Lemur albigifrons (Eulemur fulvus albifrons)</i> | <i>Lemur macaco (Eulemur macaco)</i>     | Large | NA                 | Gray (1972) #116                             | 0.1003*                                                     | AF175856.1, AF175849.1                        | "The hybrids were all under-sized and reared artificially in a children's clinic."                                                                                                                                                                                                                                                                                                                                                            |
| Rodentia       | Caviidae         | <i>Cavia porcellus</i>                              | <i>Cavia apera</i>                       | Large | NA                 | Gray (1972) #330                             | 0.0909                                                      | HM447187.1, GU136754.1                        | "Hybrids produced at the Hamburg Zoo were large, strong animals..."                                                                                                                                                                                                                                                                                                                                                                           |
| Rodentia       | Caviidae         | <i>Cavia porcellus</i>                              | <i>Cavia fulgida</i>                     | Large | Large              | Gray (1972) #332                             | 0.0934                                                      | HM447187.1, GU136737.1                        | "...no young are born at the first conception. Either the large hybrid fetuses are reabsorbed or the dam dies at parturition. Hybrids born at subsequent parturitions frequently survive. They have a high birth weight, show rapid growth and are fertile in both sexes."                                                                                                                                                                    |
| Rodentia       | Cricetidae       | <i>Clethrionomys rutilus</i>                        | <i>Clethrionomys glareolus glareolus</i> | Large | NA                 | Gray (1972) #244                             | 0.0818                                                      | AB031581.1, DQ427248.1                        | "F1 hybrids reported by Zimmermann showed hybrid vigour in pre- and postnatal development..."                                                                                                                                                                                                                                                                                                                                                 |
| Rodentia       | Cricetidae       | <i>Meriones tristrami</i>                           | <i>Meriones libycus</i>                  | Large | NA                 | Gray (1972) #249                             | 0.1509*                                                     | JQ687401.1, JQ927412.1                        | "A male and female hybrid obtained in Teheran were particularly large and vigorous animals."                                                                                                                                                                                                                                                                                                                                                  |
| Rodentia       | Cricetidae       | <i>Mesocricetus auratus</i>                         | <i>Mesocricetus newtoni</i>              | Large | NA                 | Gray (1972) #254                             | 0.1168                                                      | AB290351.1, AJ973381.1                        | "Litter size was much smaller than in the parental species, but the hybrids showed heterosis in respect of growth rate and body weight."                                                                                                                                                                                                                                                                                                      |
| Rodentia       | Cricetidae       | <i>Peromyscus interparietalis</i>                   | <i>Peromyscus eremicus</i>               | Large | NA                 | Gray (1972) #273                             | NA                                                          | No data for <i>Peromyscus interparietalis</i> | "The F1 hybrids showed heterosis"                                                                                                                                                                                                                                                                                                                                                                                                             |
| Rodentia       | Cricetidae       | <i>Peromyscus leucocephalus</i>                     | <i>Peromyscus maniculatus blandus</i>    | Large | Small              | Gray (1972) #278                             | NA                                                          | No data for <i>Peromyscus leucocephalus</i>   | "Reciprocal crosses are possible, but difficulties frequently arise at parturition if the smaller P. leucocephalus is the female parent. The placenta of dead [hybrids when P. leucocephalus is the mother] were disproportionately large."                                                                                                                                                                                                   |
| Rodentia       | Cricetidae       | <i>Peromyscus polionotus</i>                        | <i>Peromyscus maniculatus</i>            | Large | Small              | Dawson (1965), Gray (1972) #281              | 0.0399                                                      | EF423875.1, DQ358827.1                        | "... There is high incidence of maternal foetal death in the second half of pregnancy, and the P. polionotus females frequently die at parturition owing to the unusually large size of the hybrid fetuses. The smaller maternal species (P. polionotus) bears the larger hybrids and the larger maternal species (P. maniculatus) bears the smaller hybrids."                                                                                |
| Rodentia       | Cricetidae       | <i>Phodopus sungorus</i>                            | <i>Phodopus campbelli</i>                | Large | Intermediate/Small | Sokolov (1993)' this study                   | 0.0371                                                      | KF673394.1, KF673395.1                        | P.c. x P.s. hybrids weigh 29g so do the parents, while P.s. x P.c. hybrids weigh 55g - Table 2, row 2 in Sokolov (1993) is body weights (in russian)                                                                                                                                                                                                                                                                                          |
| Rodentia       | Muridae          | <i>Acomys dimidiatus</i>                            | <i>Acomys minous</i>                     | Large | Small              | Gray (1972) #299                             | 0.0838                                                      | AJ233959.1, GU046553.1                        | "The hybrids weighed less at birth and showed less rapid growth than the parental species. [in the reciprocal cross] the large size of the hybrid embryos tended to result in deficiencies at or before parturition. The post-natal growth of the hybrids was more rapid than in the parental species."                                                                                                                                       |
| Rodentia       | Muridae          | <i>Mus spretus</i>                                  | <i>Mus musculus</i>                      | Large | Small              | Zechner (1996)                               | 0.0963                                                      | AB033700.1, AC_000026.1                       | "increased placental size occurred in a (spr x mus) cross... The opposite phenotype, decreased placental size, was observed in (mus x spr) and (mus x mic) crosses..."                                                                                                                                                                                                                                                                        |
| Rodentia       | Muridae          | <i>Mus macdonicus</i>                               | <i>Mus musculus</i>                      | Large | Small              | Zechner (1996)                               | 0.0686                                                      | AY057808.1, AC_000026.1                       | "increased placental size occurred in a (spr x mus) cross... The opposite phenotype, decreased placental size, was observed in (mus x spr) and (mus x mic) crosses... The occurrence of abnormally sized placenta weight in the mic crosses followed exactly the same pattern as the spr crosses"                                                                                                                                             |
| Rodentia       | Muridae          | <i>Mus specilegus</i>                               | <i>Mus musculus</i>                      | Large | NA                 | Zechner (1996)                               | NA                                                          | No data for <i>Mus specilegus</i>             | "When the (mus x spr) F1 females were backcrossed with mus males, enlarged placentas were again observed"                                                                                                                                                                                                                                                                                                                                     |

Note: many taxonomic names have changed since Gray published in 1972. Here we report the same names as Grey (1972) with current names in parentheses

\* To calculate Dxy, we aligned all sequences and trimmed the alignment to the 718 bases shared across most of the species. The single asterisk (\*) indicates species pairs that had fewer than 718 bases in this trimmed alignment and indicates that these may not be directly comparable to the others.

\*\* Low genetic divergence between polar bears and grizzly bears represents recent mitochondrial introgression and may not be indicative of the genome-wide divergence (Miller et al., 2012).

References

Allen, W. R. 1969. Factors influencing pregnant mare serum gonadotrophin production. Nature 223:64-66.  
 Allen, W. R., J. A. Skidmore, F. Stewart, and D. F. Antczak. 1993. Effects of fetal genotype and uterine environment on placental development in equids. J. Reprod. Fert. 98:55-60.  
 Dawson, W. D. 1965. Fertility and size inheritance in a *Peromyscus* species cross. Evolution 19:44-55.  
 Gray, A. P. 1972. Mammalian hybrids. 2nd ed. Commonwealth Agricultural Bureau, Slough, UK.  
 Miller, W., et al. 2012. Polar and brown bear genomes reveal ancient admixture and demographic footprints of past climate change. Proc. Natl. Acad. Sci. 109:E2382-2390.  
 Sokolov, V. E., and N. I. Vasil'eva. 1993. Hybridologic analysis confirms the species specificity of *Phodopus sungorus* (Pallas, 1773) and *Phodopus campbelli* (Thomas, 1905). Dokl. Akad. Nauk. 332:120-123.  
 Zechner, U., et al. 1996. An X-chromosome linked locus contributes to abnormal placental development in mouse interspecific hybrids. Nature Genet. 12:398-403.

**Table S2: PCR Primer Sequences and Reaction Conditions**

| Primer Name              | Sequence 5' to 3'      | Melting Temp (Tm) | GenBank accession numbers or USCS gene IDs/genome builds used to design these primer pairs |
|--------------------------|------------------------|-------------------|--------------------------------------------------------------------------------------------|
| <i>CytB</i> Forward      | CCWGCCCATCAAAAYATYTC   | 60                |                                                                                            |
| <i>CytB</i> Reverse      | ACTGGTTGNCCTCCRATCA    | 60                | UCSC: uc009kob.1_mm9, m4                                                                   |
| <i>Grb10</i> Forward     | GCCTTCAGGAGGAAGACCA    | 55                |                                                                                            |
| <i>Grb10</i> Reverse     | CATGGAACCAARTGCTGNTC   | 55                | UCSC: NM_001001555_hg18, mm9, m4, cavPor2                                                  |
| <i>H19</i> Forward       | GACATGGTCCGGGTGAYG     | 55                |                                                                                            |
| <i>H19</i> Reverse       | CTGGTGRGGAGGGGCAAA     | 55                | UCSC: uc009kob.1_mm9, hg19, m4                                                             |
| <i>Igf2</i> Forward      | TGGGGAAGTCGATGTTGG     | 55                |                                                                                            |
| <i>Igf2</i> Reverse      | CGYTTGGCCTCTCTGAACKC   | 55                | UCSC: uc009kod.1_mm9, hg19, m4, cavPor3                                                    |
| <i>Igf2r</i> Forward     | ACCACGAGTGGGCTTCT      | 59                |                                                                                            |
| <i>Igf2r</i> Reverse     | GCCACCAGGAGNAGRCTGAG   | 59                | UCSC: uc008aky.1_mm9, hg18, m4, cavPor2                                                    |
| <i>Mash2</i> Forward     | GAGCGCAACCCGCTRAAG     | 57                |                                                                                            |
| <i>Mash2</i> Reverse     | TCAGTAGCCCCCTAACCACTG  | 57                | UCSC: uc009koj.1_mm9, hg18, m4, cavPor2                                                    |
| <i>Mest</i> Forward      | GAGRGATGGTGGGCCARG     | 56                |                                                                                            |
| <i>Mest</i> Reverse      | AAGGAGTTGATGAAGCCATA   | 56                | UCSC: uc009bfu.1_mm9, hg18, cavPor2                                                        |
| <i>Peg3</i> Forward      | TGTGGACAGGCTTCAITCA    | 55                |                                                                                            |
| <i>Peg3</i> Reverse      | TGTGAGAATTCTGGTCTGG    | 55                | UCSC: NM_001146186_mm9, hg18, m4, cavPor2                                                  |
| <i>Snrpn</i> Forward     | TGTGGTAAGAGTAGCAAGATGC | 55                |                                                                                            |
| <i>Snrpn</i> Reverse     | GTCTTGGTGGRCGCAITC     | 55                | UCSC: NM_022807_mm9, m4                                                                    |
| <i>Zfx</i> Forward*      | CAAAWCATGCAAGGTAGAC    | 60                |                                                                                            |
| <i>Zfx</i> Reverse*      | AGACCTGATCCAGGCAGTACCA | 60                | GenBank: X75172.1, X75171.1, NM_001044386.1, AY012058.1, M74776.1, AY012055.1              |
| <i>Grb10</i> _qper_Gen_F | CAGGTGAAGGAAGTGGGAAG   | 60                |                                                                                            |
| <i>Grb10</i> _qper_Gen_R | GGACTTTGTCCACGAAGGAA   | 60                | GenBank: JX217835.1, JX217834.1                                                            |
| <i>H19</i> _qper_F1      | TGGTCTCTCAAGCAAAGAA    | 60                |                                                                                            |
| <i>H19</i> _qper_R1      | CGTCACTCCCTCTGTCTT     | 60                | GenBank: JX217837.1, JX217836.1                                                            |
| <i>Igf2</i> _qper_F1     | GAGGCATCGTGAAGAGTG     | 60                |                                                                                            |
| <i>Igf2</i> _qper_R1     | ACACGTCCTCTCGGACTT     | 60                | GenBank: JX217838.1, JX217839.1                                                            |
| <i>Igf2r</i> _qper_F2    | AATGACCACACTTCAGCAG    | 60                |                                                                                            |
| <i>Igf2r</i> _qper_R2    | TGGAAGAAGATGGTGTAGA    | 60                | GenBank: JX_217841.1, JX217840.1                                                           |
| <i>Mash2</i> _qper_F2    | CGTTATCTCTCCCGCAGT     | 60                |                                                                                            |
| <i>Mash2</i> _qper_R2    | CACCGACTCAGCTCTCC      | 60                | GenBank: JX217843.1, JX217842.1                                                            |
| <i>Mest</i> _qper_F1     | GCTTTGGCTCAGTGACAAA    | 60                |                                                                                            |
| <i>Mest</i> _qper_R1     | TGATTCTGGGTTCTGTAGC    | 60                | GenBank: JX217845.1, JX217844.1                                                            |
| <i>Peg3</i> _qper_F1     | CAGATGGAGAAGCTGCTGAG   | 60                |                                                                                            |
| <i>Peg3</i> _qper_R2     | CTTTCTGGGTCTCGATCC     | 60                | GenBank: JX217847.1, JX217846.1                                                            |
| <i>Snrpn</i> _qper_F1    | GGAGGGTCCACTCTAAAG     | 60                |                                                                                            |
| <i>Snrpn</i> _qper_R1    | GGACAGGACCTGTAAATCCA   | 60                | GenBank: JX217849.1, JX217848.1                                                            |
| <i>Ywhaz</i> _qper_F1    | GCCTGCTCTTGCAAAAAAC    | 60                |                                                                                            |
| <i>Ywhaz</i> _qper_R2    | ATTTCCCTCTCTCTCTG      | 60                | CHO-K1 ( GCA_000223135.1)                                                                  |

PCR reaction conditions: 2min at 94c, 30x(15sec at 94c, 15sec at Tm, 60sec at 72c), 60sec at 72c, hold at 10c  
 qPCR reaction conditions 10min at 95c, 40x(30sec at 95c, 15sec at Tm, 15sec at 72c), 1min at 95c, 30sec at 55c, 30sec at 95c

\*This primer pair is similar to LGL331 and LGL335 from Shaw (2003) but have some slight modifications that result in them not amplifying *Zfy* in hamsters. We have therefore chosen to name them differently despite their similarities and common origin.

Shaw, C. N., P. J. Wilson, and B. N. White. 2003. A reliable molecular method of gender determination for mammals. *J. Mammal.* 84:123–128.
